# Supplementary material for: Facile construction of CuFe2O4/g-C3N4photocatalyst for enhanced visible-light hydrogen evolution
Source: Royal Society of Chemistry journal article supplement (doi:10.1039/c5ra27221a), 2016-01-01
Supplement: c5ra27221a1.pdf [file c5ra27221a1.pdf]

## Supporting Information

### **Facile construction of $\text{CuFe}_2\text{O}_4/\text{g-C}_3\text{N}_4$ photocatalyst for enhanced visible-light hydrogen evolution**

*Ruolin Cheng, Xiangqian Fan, Min Wang, Mengli Li, Jianjian Tian, Lingxia Zhang\**

State Key Laboratory of High Performance Ceramics and Superfine Microstructure,  
Shanghai Institute of Ceramics, Chinese Academy of Sciences, 1295 Ding-xi Road,  
Shanghai 200050 (P. R. China)

Correspondence to:

E-mail: [zhlingxia@mail.sic.ac.cn](mailto:zhlingxia@mail.sic.ac.cn) (L.X. Zhang)

## Supplementary Figures and Tables

**Table S1.** Cu, Fe content of the as-prepared CN and xCuFe-CN samples

| Sample                                                            | CN  | 1CuFe-CN | 3CuFe-CN | 5CuFe-CN | 10CuFe-CN | 30CuFe-CN |
|-------------------------------------------------------------------|-----|----------|----------|----------|-----------|-----------|
| Cu/ wt%                                                           | /   | 0.02     | 0.10     | 0.13     | 0.22      | 0.69      |
| Fe/ wt%                                                           | /   | 0.05     | 0.19     | 0.23     | 0.45      | 1.24      |
| g-C <sub>3</sub> N <sub>4</sub> /wt%                              | 100 | 99.9     | 99.7     | 99.6     | 99.3      | 98.1      |
| <sup>a</sup> Yield /g                                             | 0.9 | 0.76     | 0.72     | 0.71     | 0.69      | 0.61      |
| <sup>a</sup> Net amount of<br>g-C <sub>3</sub> N <sub>4</sub> / g | 0.9 | 0.76     | 0.72     | 0.71     | 0.69      | 0.60      |

<sup>a</sup> Yield of samples and the net amount of g-C<sub>3</sub>N<sub>4</sub> in the samples obtained from 20 g urea and x mg CuFe<sub>2</sub>O<sub>4</sub> precursor

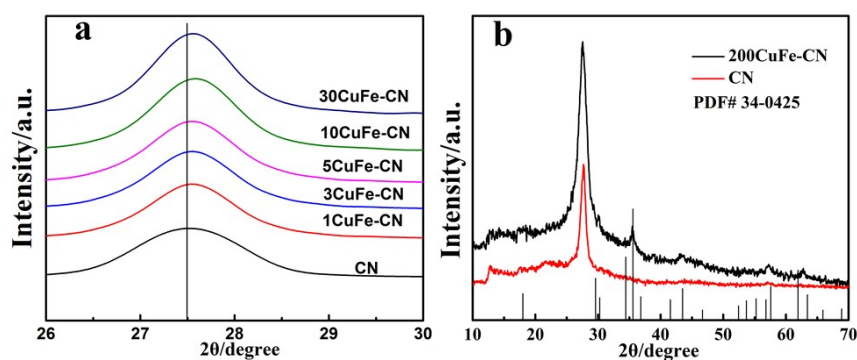

**Figure S1.** (a) Enlarged XRD patterns of xCuFe-CN composite with different mass fraction; (b) XRD patterns of CN and 200CuFe-CN.

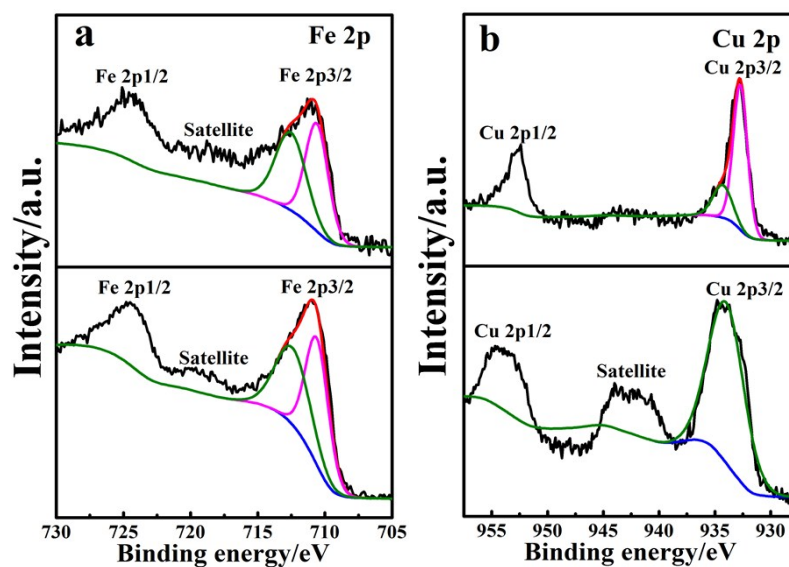

Figure S2. XPS spectra of CuFe and 200CuFe-CN:(a) Fe 2p, (b) Cu 2p spectra.

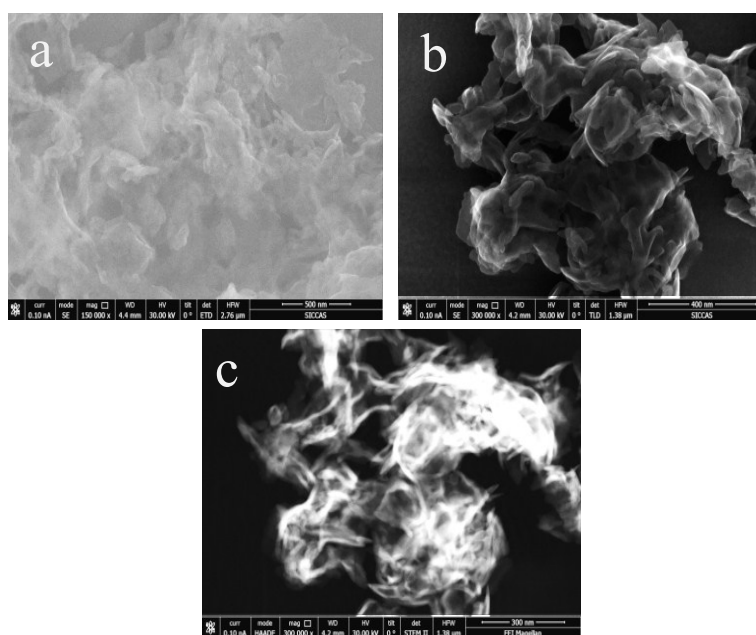

Figure S3. Typical SEM images of (a) CN and (b) 3CuFe-CN, (c) STEM image of 3CuFe-CN.

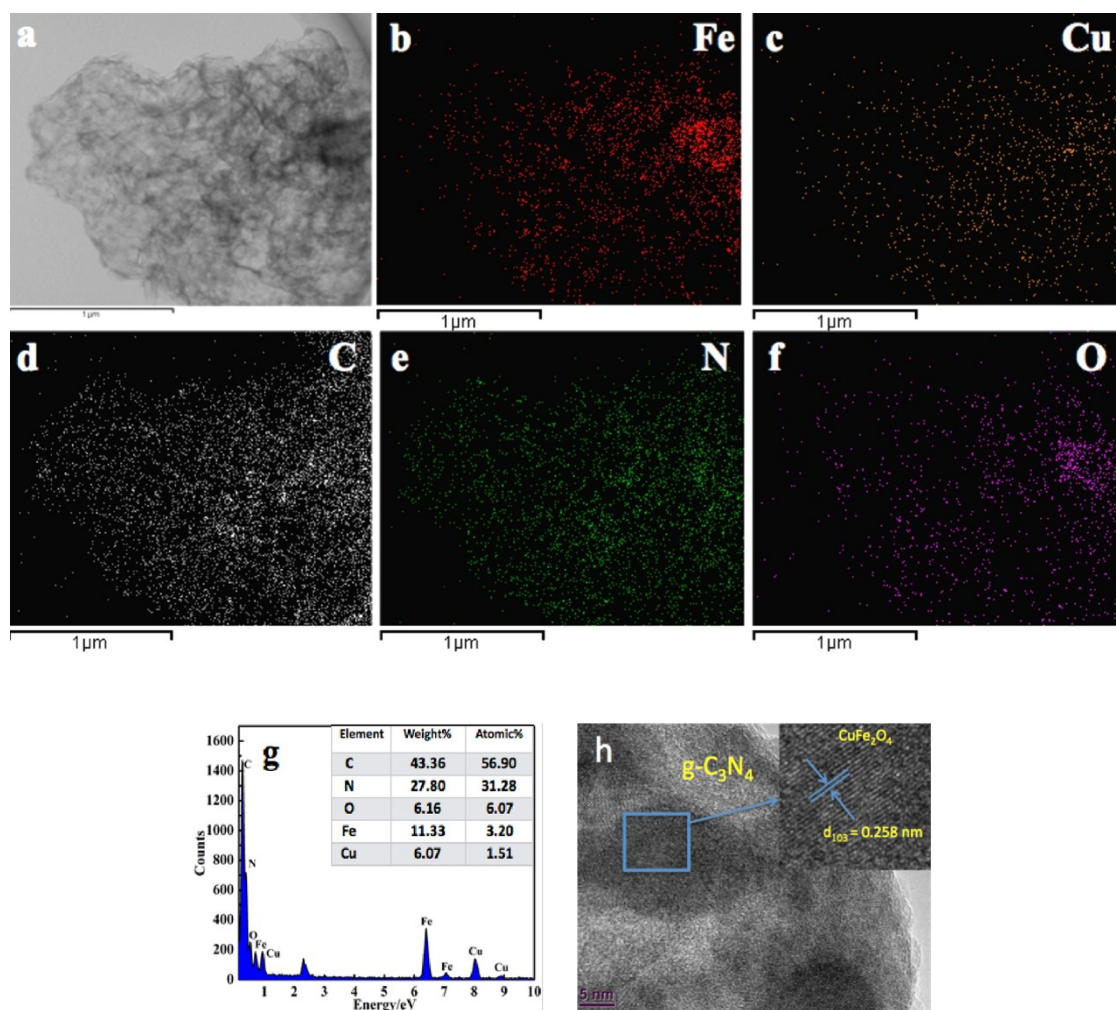

**Figure S4.** STEM (a) and the corresponding element mappings (b–f) and the EDX spectrum, (g) HRTEM image of 200CuFe-CN.

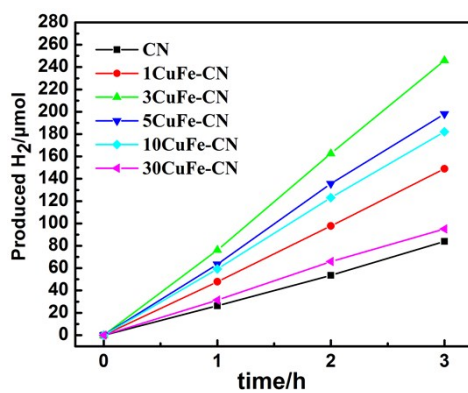

**Figure S5.** Photocatalytic H<sub>2</sub> evolution on pure CN and xCuFe-CN composite under visible light irradiation ( $\lambda > 420$  nm).

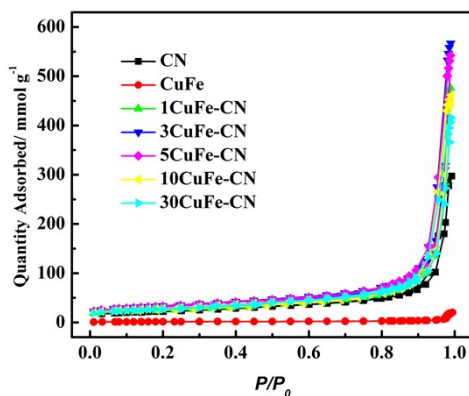

**Figure S6.** N<sub>2</sub> adsorption-desorption isotherms of CN, CuFe and xCuFe-CN composite.

**Table S2.** Summary of bandgap results of CN, CuFe and xCuFe-CN composite

| Sample     | CN   | CuFe | 1CuFe-CN | 3CuFe-CN | 5CuFe-CN | 10CuFe-CN | 30CuFe-CN |
|------------|------|------|----------|----------|----------|-----------|-----------|
| Bandgap/eV | 2.89 | 1.42 | 2.88     | 2.86     | 2.85     | 2.83      | 2.82      |

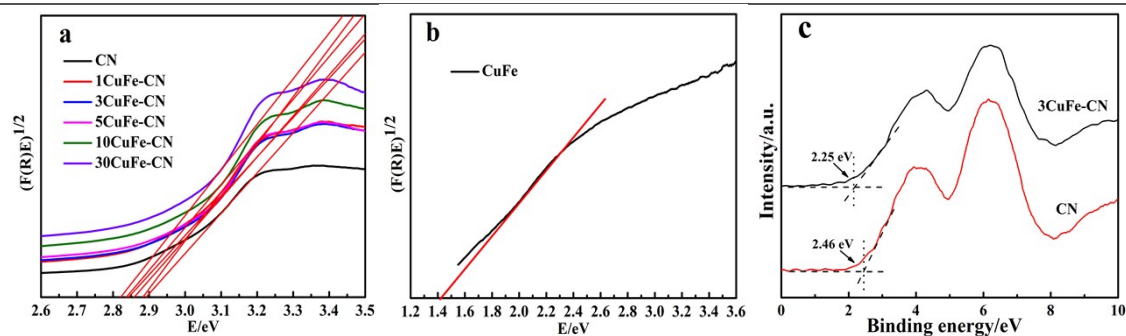

**Figure S7.** The Tauc plots of CN and xCuFe-CN samples (a), and CuFe (b). Each bandgap is determined by the intersection point of the corresponding tangent line and horizontal axis. Valence band XPS spectra of traditional CN and 3CuFe-CN (c).

The Kubelka–Munk method was used to determine the bandgaps of CN, CuFe and all the modified samples. The intrinsic HOMO energy levels of CN and 3CuFe-CN were analysed by performing the valence band X-ray photoelectron spectroscopy.
